# Supplementary material for: Arabidopsis YL1/BPG2 Is Involved in Seedling Shoot Response to Salt Stress through ABI4
Source: PubMed Central journal article supplement (PMC4957093; doi:10.1038/srep30163), 2016-07-22
Supplement: srep30163-s1.pdf [file srep30163-s1.pdf]

**Title: *Arabidopsis* YL1/BPG2 Is Involved in Seedling Shoot Response to Salt Stress through ABI4**

**Authors:** Peng-Cheng Li<sup>1,2†</sup>, Jin-Guang Huang<sup>1†</sup>, Shao-Wei Yu<sup>1</sup>, Yuan-Yuan Li<sup>1</sup>, Peng Sun<sup>1</sup>, Chang-Ai Wu<sup>1</sup>, and Cheng-Chao Zheng<sup>1\*</sup>

**Affiliations:**

<sup>1</sup>State Key Laboratory of Crop Biology, College of Life Sciences, Shandong Agricultural University, Tai'an, Shandong 271018, PR China

<sup>2</sup>High-Tech Research Center, Shandong Academy of Agricultural Sciences, Shandong Provincial Key Laboratory of Crop Genetic Improvement, Ecology and Physiology, Jinan, Shandong, PR China

<sup>†</sup>These authors contributed equally to this work.

\*Correspondence should be addressed to C-C.Z. (e-mail: cczheng@sdau.edu.cn)

## Supplementary information

Supplementary Figure 1. Root phenotype of *yli-1*.

Supplementary Figure 2. Mature plant phenotypes of wild type, *yli-1*, *yli-2*, *yli-1com*, and *yli-1 yli-2* (cross F1 line).

Supplementary Figure 3. GUS activity analysis of the *pYLI-GUS* transgenic plants under salinity treatment.

Supplementary Figure 4. Transcriptional analysis of *YLI* in roots under salt-treatment.

Supplementary Figure 5. Transcriptional analysis of SOS pathway genes, *NHX1*, and ABA biosynthesis pathway genes in seedling shoots.

Supplementary Figure 6. Transcriptional analysis of SOS pathway genes, *NHX1*, and ABA biosynthesis pathway genes in seedling roots.

Supplementary Table 1. Key primers used in this study.

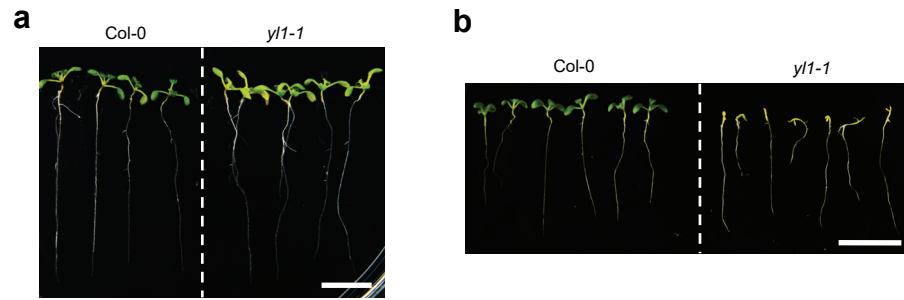

**Supplementary Figure 1. Root phenotype of *y11-1*.**

(a) Phenotype of 10-d-old seedling roots under control conditions. Scale bars = 5 mm.

(b) Phenotype of 10-d-old seedling roots under 150 mM NaCl conditions. Scale bars = 5 mm.

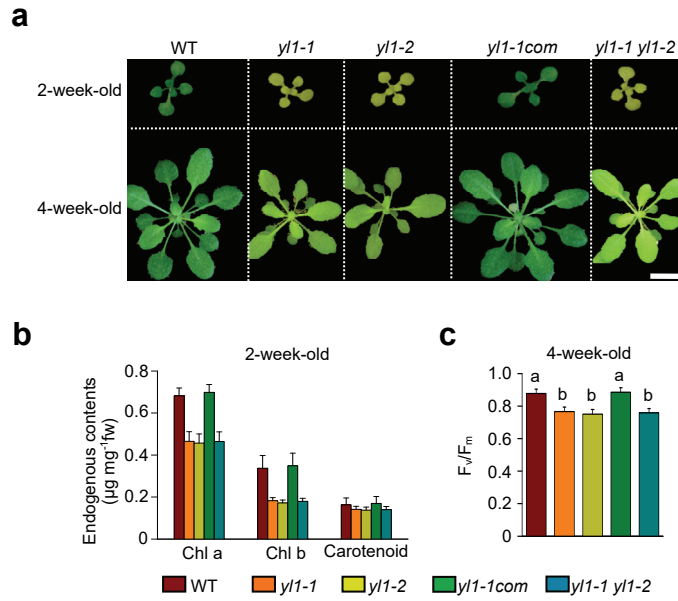

**Supplementary Figure 2. Mature plant phenotypes of wild type, *yll-1*, *yll-2*, *yll-1com*, and *yll-1 yll-2* (cross F1 line).**

(a) Phenotypes of 2/4-week-old wild type, *yll-1*, *yll-2*, *yll-1com*, and *yll-1 yll-2* (F1) grown under normal growth conditions. Scale bars = 10 mm.

(b) Endogenous contents of chlorophyll a, chlorophyll b, and carotenoid in 2-week-old wild type, *yll-1*, *yll-2*, *yll-1com*, and *yll-1 yll-2* (F1).

(c)  $F_v/F_m$  of 4-week-old wild type, *yll-1*, *yll-2*, *yll-1com*, and *yll-1 yll-2* (F1).

Data are mean values of three replicates  $\pm$  SE. Statistical significant differences are indicated by different lowercase letters ( $P < 0.01$ ).

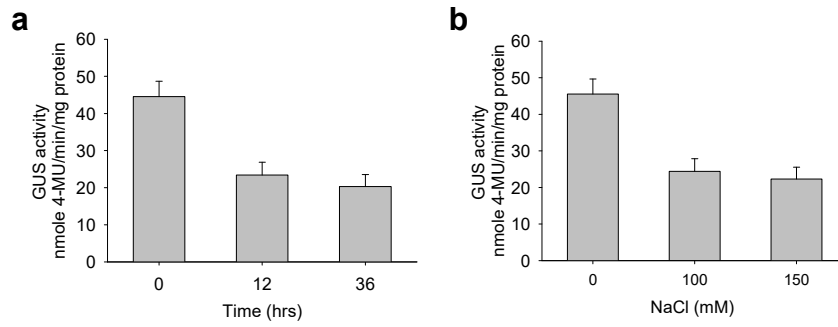

**Supplementary Figure 3. GUS activity analysis of the *pYL1-GUS* transgenic plants under salinity treatment.**

(a) GUS activity analysis of 5-d-old seedlings treated with 150 mM NaCl for 0, 12, or 36 h.

(b) GUS activity analysis of 5-d-old seedlings treated with 0, 100, or 150 mM NaCl for 36 h.

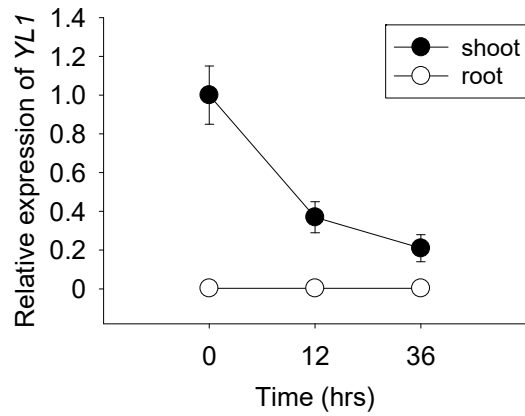

**Supplementary Figure 4. Transcriptional analysis of *YL1* in roots under salt-treatment.**

Total RNA was isolated from roots of 5-d-seedlings treated with control or 150 mM NaCl for 0, 12, or 36 h. Values are means  $\pm$  SE of three independent replicates.

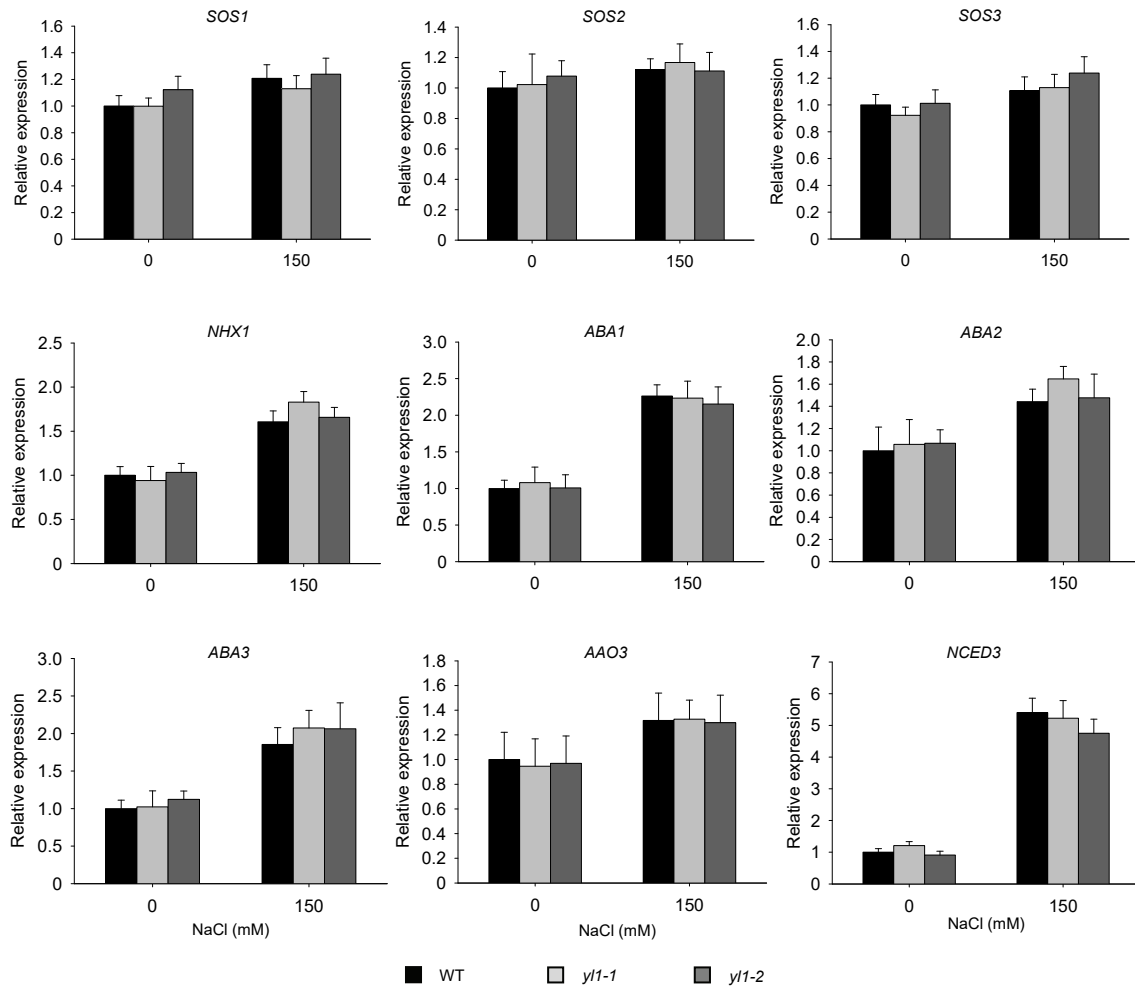

**Supplementary Figure 5. Transcriptional analysis of SOS pathway genes, *NHX1*, and ABA biosynthesis pathway genes in seedling shoots.**

*SOS1*, *SOS2*, and *SOS3* are SOS pathway genes; *ABA1*, *ABA2*, *ABA3*, *AAO3*, and *NCED3* are ABA biosynthesis associated genes. Total RNA was isolated from shoots of 5-d-seedlings treated with control or 150 mM NaCl for 12 h. Values are means  $\pm$  SE of three independent replicates.

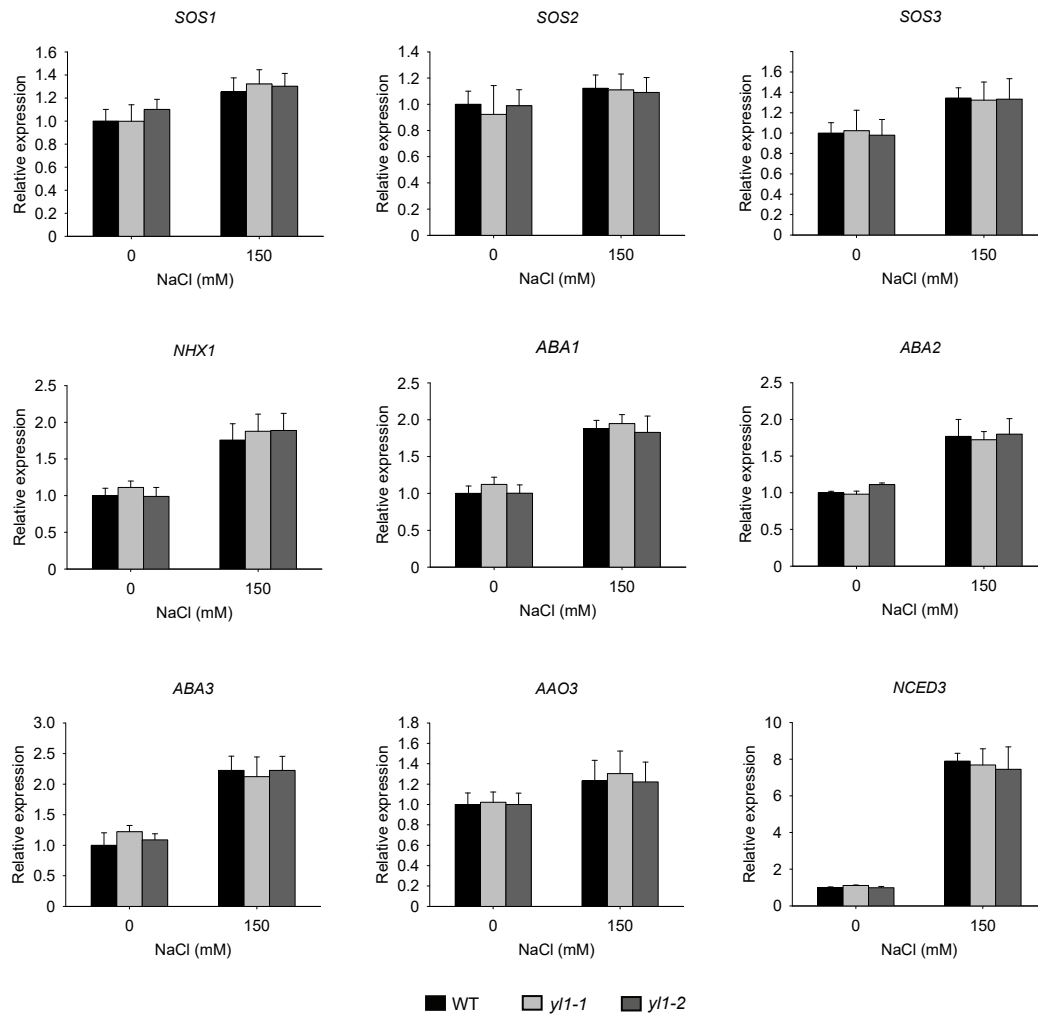

**Supplementary Figure 6. Transcriptional analysis of SOS pathway genes, *NHX1*, and ABA biosynthesis pathway genes in seedling roots.**

*SOS1*, *SOS2*, and *SOS3* are SOS pathway genes; *ABA1*, *ABA2*, *ABA3*, *AAO3*, and *NCED3* are ABA biosynthesis associated genes. Total RNA was isolated from roots of 5-d-seedlings treated with control or 150 mM NaCl for 12 h. Values are means  $\pm$  SE of three independent replicates.



## Supplementary Table 1. Primers used in this study.

| Purpose                                       | Primer name           | Sequence (5'-3')                                                |
|-----------------------------------------------|-----------------------|-----------------------------------------------------------------|
| Complementation and overexpression constructs | YL1-forward (P1)      | GGATCCATGGTGGTTTTGATTCAAGTACAG                                  |
|                                               | YL1-reverse (P2)      | TGCGACCTAAGCAACACTATCAGAGAGAAAATC                               |
| GFP expression constructs                     | YL1-forward           | TCTAGAATGGTGGTTTTGATTCAAGTACAGTG                                |
|                                               | YL1-reverse           | GGATCCAGCAACACTATCAGAGAGAAAATCTGT                               |
|                                               | GFP-forward           | GGATCCGGTGGTGGTAGTAGTGGTGGTGG-<br>-TATGAAGACTAATCTTTTTCTCTTTCTC |
|                                               | GFP-reverse           | GTCGACTTAAAGCTCATCATGTTTGTATAGTTC                               |
| GUS expression constructs                     | YL1-promoter-forward  | GTCGACATGGTGGTTGATTCAAGTACAG                                    |
|                                               | YL1-promoter-reverse  | GGATCCAGCAACACTATCAGAGAGAAAATC                                  |
| qRT-PCR                                       | ABA1-forward          | TGCTACTCTATCAATCCATCTCC                                         |
|                                               | ABA1-reverse          | TCTTCTCCTCCTTCTCAACTAAC                                         |
|                                               | ABA2-forward          | AGGAGCCACAGGGATAGG                                              |
|                                               | ABA2-reverse          | ACTCACCACGAAGCAGAC                                              |
|                                               | ABA3-forward          | CCGAGGAGAGTGTGCTGAC                                             |
|                                               | ABA3-reverse          | AACCGCCCAATGATGTGAAATG                                          |
|                                               | AAO3-forward          | TGCTTATGGTCTCGGTATGG                                            |
|                                               | AAO3-reverse          | CCTAACGGCTTCACAACCTG                                            |
|                                               | NCED3-forward         | GGTCGTGTGAGTTCTTATGTG                                           |
|                                               | NCED3-reverse         | ACTGGTAAATCTCGCTCTCTC                                           |
|                                               | ABI5-forward          | AACCTAATCCAACCCGAACC                                            |
|                                               | ABI5-reverse          | ACCCTCCTCCTCCTGTCC                                              |
|                                               | ABI4-forward          | CTTCTCCTCCTCGTCTC                                               |
|                                               | ABI4-reverse          | GTTGGCTCCTCCTCCTAC                                              |
|                                               | HKT1-forward          | TCTGGTCTCATCTGGCTCCTAATC                                        |
|                                               | HKT1-reverse          | CACCGTCACTCCAAGAAGAACAC                                         |
|                                               | SOS1-forward          | TGGAGGAAGCGACCGATTTC                                            |
|                                               | SOS1-reverse          | CGATAACGAGAAGAGCGACAG                                           |
|                                               | SOS2-forward          | CTGTTGCTCATTGCTACTG                                             |
|                                               | SOS2-reverse          | CGTAACCCTGTCCACTAAG                                             |
|                                               | SOS3-forward          | GTCACGCCATTACGGTAG                                              |
|                                               | SOS3-reverse          | CACTCCATTCGCTTCACATC                                            |
|                                               | NHX1-forward          | AGGTGCTGTATCTATGGCTCTTG                                         |
|                                               | NHX1-reverse          | GCTCGTGGTGGCGTTCTG                                              |
| YL1-forward (qP1)                             | GGATTGATGTAACCTTGAGAG |                                                                 |
| YL1-reverse (qP2)                             | GCTGTCTTGTGCTTCTTC    |                                                                 |
| Actin2-forward                                | CTTCGCTTCCACTTCAG     |                                                                 |
| Actin2-reverse                                | ATCATACCAGTCTCAACAC   |                                                                 |
